# Supplementary material
Source: Springer Nature journal article supplement (https://www.springermedizin.de/resource/supplementary/12913_2011_2323_MOESM1_ESM.pdf/9529962)
Supplement: MOESM1 [file 9529962]

## **ADDITIONAL FILE 1**

**Evaluating acute stroke services: risk adjusted cost-effectiveness (RAC-E) analysis using routinely collected data.**

**C Pham, O Caffrey, J Karnon, D Ben-Tovim, P Hakendorf, M Crotty.**

Table 1. Relevant covariates for the stroke cost extrapolation models

Table 2. Relevant covariates for the stroke survival extrapolation models

Table 3. Relevant covariates for the expected lifetime survival and cost models

**Table 1. Relevant covariates for the stroke cost extrapolation models**

| Explanatory variables                 | Recurrent Stroke Event, Year 1 |                | Recurrent Stroke Event, Year 2 |                | Major Cardiac Event, Year 1 |                | Major Cardiac Event, Year 2 |                | No event       |                |
|---------------------------------------|--------------------------------|----------------|--------------------------------|----------------|-----------------------------|----------------|-----------------------------|----------------|----------------|----------------|
|                                       | Non-zero cost                  | Annual cost    | Non-zero cost                  | Annual cost    | Non-zero cost               | Annual cost    | Non-zero cost               | Annual cost    | Non-zero cost  | Annual cost    |
| Age                                   | -0.030 (0.000)                 |                |                                |                |                             | 0.199 (0.000)  |                             |                |                | -0.414 (0.001) |
| Age <sup>2</sup>                      |                                | 0.003 (0.000)  |                                |                |                             |                |                             |                |                | 0.006 (0.001)  |
| Age <sup>3</sup>                      |                                | -0.000 (0.000) |                                |                |                             | -0.000 (0.000) |                             | -0.000 (0.000) |                | -0.000 (0.000) |
| Age x sex                             |                                |                |                                |                | 0.064 (0.004)               |                |                             |                |                |                |
| Age <sup>3</sup> x sex                |                                |                |                                |                | -0.000 (0.008)              |                |                             |                |                |                |
| Stroke severity                       |                                | 0.874 (0.000)  | 0.167 (0.036)                  |                |                             |                |                             |                |                |                |
| Recurrent stroke severity             |                                | -0.482 (0.000) |                                |                |                             |                |                             |                |                |                |
| Sex                                   |                                | 1.430 (0.000)  | -0.358 (0.001)                 |                | -3.605 (0.002)              |                |                             |                |                |                |
| Septicaemia                           |                                | 1.085 (0.000)  |                                | -1.326 (0.000) |                             | -0.698 (0.014) |                             |                |                |                |
| Anaemia                               |                                | -1.318 (0.000) |                                |                |                             | 0.530 (0.003)  |                             | -0.346 (0.042) |                |                |
| Dementia incl. Alzheimer's            |                                |                |                                | -1.067 (0.001) |                             |                | -0.417 (0.006)              |                |                | -0.542 (0.000) |
| Acute LRTI & influenza                |                                | 0.489 (0.027)  |                                |                |                             |                |                             |                |                |                |
| Chronic obstructive pulmonary disease |                                | -0.682 (0.000) |                                |                |                             |                |                             |                |                |                |
| Urinary tract infection               |                                | -0.771 (0.000) |                                |                |                             | 0.366 (0.033)  |                             |                |                | -0.175 (0.005) |
| Urinary symptoms                      |                                | 0.557 (0.000)  |                                |                |                             | -0.445 (0.002) |                             |                |                |                |
| Minor vascular co-morbidity           |                                | 1.020 (0.000)  |                                |                |                             |                |                             | 0.430 (0.005)  |                |                |
| Major vascular co-morbidity           |                                |                |                                |                |                             |                | 0.422 (0.011)               |                | 0.259 (0.000)  |                |
| Vascular procedures                   |                                |                |                                |                |                             |                |                             | 0.679 (0.000)  |                |                |
| Circulatory disorders with AMI        |                                |                |                                |                |                             |                |                             | 1.071 (0.000)  |                |                |
| Venous thrombosis                     |                                |                |                                |                |                             | -1.337 (0.003) |                             | 0.528 (0.006)  |                |                |
| Infective endocarditis                |                                |                |                                |                |                             |                | -1.501 (0.000)              |                |                |                |
| Hypertension                          |                                |                |                                |                |                             |                | -1.266 (0.000)              |                | -1.102 (0.000) |                |
| Non-major arrhythmia                  |                                |                |                                |                |                             |                | -0.687 (0.000)              |                |                |                |
| Percutaneous coronary intervention    |                                |                |                                |                |                             |                |                             | 0.904 (0.029)  |                |                |
| Peripheral vascular disorders         |                                |                |                                |                |                             |                |                             | 0.323 (0.032)  | 0.668 (0.001)  |                |
| Coronary atherosclerosis              |                                |                |                                |                |                             |                |                             | 0.418 (0.001)  |                |                |
| Diabetic co-morbidity                 |                                | -0.436 (0.000) | 0.339 (0.003)                  |                |                             |                |                             |                | 0.193 (0.000)  | 0.334 (0.005)  |
| Renal co-morbidity                    |                                | 1.316 (0.000)  |                                |                |                             |                |                             |                |                |                |
| Renal co-morbidity x hemiplegia       | 1.244 (0.000)                  |                |                                |                |                             |                |                             |                |                |                |
| Lower limb or decubitus ulcer         |                                |                |                                | -0.697 (0.003) |                             |                |                             |                |                |                |
| Hemiplegia                            |                                | -0.379 (0.000) |                                |                |                             |                |                             |                |                |                |
| Amputation for circulatory system     |                                |                |                                |                |                             |                |                             | -0.324 (0.001) |                |                |
| Malignancy                            |                                |                |                                |                |                             |                |                             | 0.574 (0.009)  | -0.284 (0.013) |                |
| Intestinal disorders                  |                                |                |                                |                |                             |                |                             |                | 0.153 (0.005)  | -0.258 (0.029) |

(Continued)

**Table 1. Continued**

| Explanatory variables                                         | Recurrent Stroke Event, Year 1 |                | Recurrent Stroke Event, Year 2 |               | Major Cardiac Event, Year 1 |             | Major Cardiac Event, Year 2 |               | No event       |               |
|---------------------------------------------------------------|--------------------------------|----------------|--------------------------------|---------------|-----------------------------|-------------|-----------------------------|---------------|----------------|---------------|
|                                                               | Non-zero cost                  | Annual cost    | Non-zero cost                  | Annual cost   | Non-zero cost               | Annual cost | Non-zero cost               | Annual cost   | Non-zero cost  | Annual cost   |
| SEIFA decile                                                  |                                |                |                                |               |                             |             |                             |               | 0.025 (0.049)  |               |
| Economic resources decile                                     | 0.628 (0.000)                  |                |                                |               |                             |             |                             |               | -0.032 (0.018) |               |
| Socioeconomic disadvantage decile                             | -0.561 (0.001)                 | -0.145 (0.000) |                                |               |                             |             |                             |               |                |               |
| SEIFA x socioeconomic disadvantage deciles                    |                                |                |                                |               |                             |             | 0.028 (0.000)               |               |                |               |
| SEIFA x education and occupation deciles                      |                                |                |                                |               |                             |             | 0.023 (0.001)               |               |                |               |
| Socioeconomic disadvantage x education and occupation deciles |                                |                |                                |               |                             |             | -0.052 (0.000)              |               |                |               |
| Public patient                                                |                                |                |                                |               |                             |             | -0.191 (0.038)              |               |                |               |
| Emergency patient                                             |                                | 1.036 (0.000)  |                                |               |                             |             |                             |               |                |               |
| Transferred patient                                           |                                | 0.860 (0.004)  |                                |               |                             |             |                             |               |                |               |
| Constant                                                      |                                |                | -1.231 (0.000)                 | 10790 (0.000) |                             |             | -1.010 (0.000)              | 9.183 (0.000) | 7.289 (0.013)  | 9.035 (0.000) |

Values reported are coefficient values (p-values).

Logistic models predicted probabilities of patients incurring costs in a particular year, GLMs predicted the cost magnitude, if incurred.

SEIFA - aggregate socioeconomic index for areas variable; SEIFA, socioeconomic, economic resources, and education and occupation deciles: 1 (lowest socioeconomic status), 10 (highest socioeconomic status).

LRTI - lower respiratory tract infection.

AMI - acute myocardial infarction.

**Table 2. Relevant covariates for the stroke survival extrapolation models**

| Explanatory variables                         | Recurrent Stroke Event | Major Cardiac Event | No event      |
|-----------------------------------------------|------------------------|---------------------|---------------|
| Age <sup>3</sup>                              |                        | 1.000 (0.000)       |               |
| Age(sqrt)                                     |                        |                     | 2.471 (0.000) |
| Age <sup>2</sup> x recurrent stroke severity  | 1.000 (0.000)          |                     |               |
| Age x stroke severity                         |                        |                     | 0.985 (0.001) |
| Age <sup>2</sup> x stroke severity            |                        |                     | 1.000 (0.004) |
| Age <sup>2</sup> x sex                        |                        |                     | 0.999 (0.000) |
| Age x dementia incl. Alzheimer's              |                        |                     | 1.073 (0.000) |
| Age <sup>2</sup> x dementia incl. Alzheimer's |                        |                     | 0.999 (0.000) |
| Stroke severity                               |                        | 0.761 (0.000)       |               |
| Recurrent stroke severity                     | 0.286 (0.000)          |                     |               |
| Sex                                           |                        | 0.657 (0.000)       |               |
| Anaemia                                       |                        | 1.423 (0.003)       | 1.354 (0.006) |
| Dementia incl. Alzheimer's                    |                        | 1.323 (0.000)       |               |
| Acute LRTI and influenza                      | 2.128 (0.000)          |                     |               |
| Chronic obstructive pulmonary disease         | 1.620 (0.012)          | 1.569 (0.000)       | 1.290 (0.034) |
| Urinary symptoms                              | 1.724 (0.000)          |                     |               |
| Minor vascular co-morbidity                   |                        |                     | 1.272 (0.002) |
| Heart failure and shock                       |                        | 1.310 (0.019)       |               |
| Non-major arrhythmia                          |                        | 0.698 (0.017)       |               |
| Diabetic co-morbidity                         |                        | 1.323 (0.010)       |               |
| Renal co-morbidity x sex                      |                        | 1.384 (0.000)       |               |
| Renal co-morbidity x acute LRTI and influenza |                        | 1.673 (0.001)       |               |
| Malignancy                                    | 2.045 (0.000)          | 1.649 (0.002)       |               |
| Socioeconomic disadvantage decile             |                        |                     | 0.964 (0.004) |
| Emergency patient                             |                        |                     | 1.885 (0.000) |
| _rcs1                                         | 2.516 (0.000)          | 2.697 (0.000)       | 2.324 (0.000) |
| _rcs2                                         | 1.097 (0.015)          | 1.083 (0.010)       |               |
| _rcs3                                         | 0.885 (0.000)          | 0.933 (0.000)       |               |

Values reported are coefficient values (p-values).

Royston Parmar flexible survival models were fitted, \_rcs (restricted cubic splines) indicate the number of inflexion points in the fitted curves.

Education and occupation decile: 1 (lowest socioeconomic status), 10 (highest socioeconomic status).

LRTI - lower respiratory tract infection.

**Table 3. Relevant covariates for the expected lifetime survival and cost models**

| <b>Explanatory variables</b>                        | <b>Lifetime survival</b> | <b>Lifetime costs</b> |
|-----------------------------------------------------|--------------------------|-----------------------|
| Age                                                 | 0.506 (0.001)            | -1.634 (0.000)        |
| Age <sup>2</sup>                                    | 1.015 (0.000)            |                       |
| Age <sup>3</sup>                                    | 0.999 (0.000)            |                       |
| Age <sup>2</sup> x dementia incl. Alzheimer's       | 0.996 (0.000)            |                       |
| Age <sup>3</sup> x dementia incl. Alzheimer's       | 1.000 (0.000)            |                       |
| Stroke severity                                     | 0.786 (0.000)            | -17.433 (0.000)       |
| Sex                                                 | 0.598 (0.000)            |                       |
| Dementia incl. Alzheimer's                          | 224369 (0.000)           |                       |
| Acute LRTI and influenza                            |                          | 11.816 (0.030)        |
| Chronic obstructive pulmonary disease               | 1.380 (0.018)            |                       |
| Urinary symptoms                                    |                          | 9.604 (0.022)         |
| Minor vascular co-morbidity                         | 1.208 (0.026)            |                       |
| Major vascular co-morbidity                         |                          | 20.195 (0.000)        |
| Diabetic co-morbidity                               |                          | 7.753 (0.022)         |
| Stroke severity x renal co-morbidity                | 1.124 (0.004)            |                       |
| Malignancy x anaemia                                | 3.183 (0.000)            | -39.092 (0.000)       |
| Minor vascular co-morbidity x diabetic co-morbidity | 1.273 (0.006)            |                       |
| SEIFA decile                                        | 1.102 (0.012)            |                       |
| Socioeconomic disadvantage decile                   | 0.873 (0.000)            |                       |
| Economic resources decile                           |                          | -1.161 (0.016)        |
| Hospital D                                          |                          | -21.081 (0.000)       |
| Constant                                            |                          | 267.300 (0.000)       |
| _rcs1                                               | 10.723 (0.000)           |                       |
| _rcs2                                               | 0.330 (0.000)            |                       |
| _rcs3                                               | 0.262 (0.000)            |                       |
| _rcs4                                               | 0.417 (0.000)            |                       |
| _rcs5                                               | 0.760 (0.000)            |                       |

Values reported are coefficient values (p-values).

Royston Parmar flexible survival models were fitted, \_rcs (restricted cubic splines) indicate the number of inflexion points in the fitted curves.

GLM predicted the cost magnitudes.

SEIFA - aggregate socioeconomic index for areas variable; SEIFA, socioeconomic, and economic resources deciles: 1 (lowest socioeconomic status), 10 (highest socioeconomic status).

LRTI - lower respiratory tract infection.
